# Supplementary material for: Enrichment of SARM1 alleles encoding variants with constitutively hyperactive NADase in patients with ALS and other motor nerve disorders
Source: eLife journal article supplement (doi:10.7554/elife.70905), 2021-11-19
Supplement: fig2-data1 [file Figure_2_source_data_1.xlsx]

## Sheet: Figure 2A
Figure 2A source data
NAD (proportion of empty vector)
Original values plotted on graph
	WT	V112I	L223P	Δ229-235	A240E	R244S	Δ249-252	A250T	A275V	A301S	R310H	V331E	E340K	A341V	T385A	P332Q	N337D
	0.459		0.08	0.086	0.587	0.872	0.087	0.511	0.25	0.524	0.47	0.073	0.08	0.342	0.146	0.74
	0.403		0.085	0.082	0.522	0.318	0.08	0.411	0.227	0.319	0.33	0.08	0.081	0.276	0.14	0.576
	0.596		0.109	0.109	0.812	0.597	0.125	0.563	0.284	0.47	0.835	0.111	0.11	0.413	0.175	0.834
	0.416	0.2	0.069	0.07	0.514	0.329	0.065	0.493	0.205	0.325	0.335	0.067	0.07	0.273	0.108	0.482	0.489
	0.558	0.337	0.153	0.155	0.672	0.458	0.134	0.577	0.287	0.463	0.586	0.162	0.13	0.34	0.19	0.708	0.691
		0.179															0.549
		0.175															0.728
		0.254															0.501
Mean	0.4864	0.229	0.0992	0.1004	0.6214	0.5148	0.0982	0.511	0.2506	0.4202	0.5112	0.0986	0.0942	0.3288	0.1518	0.668	0.5916
SEM	0.0386013	0.0304516	0.0149546	0.0150419	0.0554469	0.102671	0.0133394	0.0294822	0.015933	0.0414673	0.0938133	0.0175687	0.0111642	0.0257787	0.0142983	0.0622093	0.0495153
log10 transformed values used for multiple pairwise comparisons to WT (unmatched data) with FDR correction
	WT	V112I	L223P	Δ229-235	A240E	R244S	Δ249-252	A250T	A275V	A301S	R310H	V331E	E340K	A341V	T385A	P332Q	N337D
	-0.338187		-1.09691	-1.0655	-0.231362	-0.0594835	-1.06048	-0.291579	-0.60206	-0.280669	-0.327902	-1.13668	-1.09691	-0.465974	-0.835647	-0.130768
	-0.394695		-1.07058	-1.08619	-0.282329	-0.497573	-1.09691	-0.386158	-0.643974	-0.496209	-0.481486	-1.09691	-1.09151	-0.559091	-0.853872	-0.239578
	-0.224754		-0.962574	-0.962574	-0.090444	-0.224026	-0.90309	-0.249492	-0.546682	-0.327902	-0.0783135	-0.954677	-0.958607	-0.38405	-0.756962	-0.0788339
	-0.380907	-0.69897	-1.16115	-1.1549	-0.289037	-0.482804	-1.18709	-0.307153	-0.688246	-0.488117	-0.474955	-1.17393	-1.1549	-0.563837	-0.966576	-0.316953	-0.310691
	-0.253366	-0.47237	-0.815309	-0.809668	-0.172631	-0.339135	-0.872895	-0.238824	-0.542118	-0.334419	-0.232102	-0.790485	-0.886057	-0.468521	-0.721246	-0.149967	-0.160522
		-0.747147															-0.260428
		-0.756962															-0.137869
		-0.595166															-0.300162

## Sheet: Figure 2B
Figure 2B source data
NADP (proportion of empty vector)
Original values plotted on graph
	WT	V112I	L223P	Δ229-235	A240E	R244S	Δ249-252	A250T	A275V	A301S	R310H	V331E	E340K	A341V	T385A	P332Q	N337D
	0.695		0.329	0.325	0.758	1.142	0.357	0.827	0.567	0.88	0.736	0.306	0.343	0.675	0.447	0.98
	0.653		0.281	0.313	0.834	0.702	0.335	0.863	0.531	0.617	0.586	0.293	0.309	0.708	0.437	0.961
	0.93		0.386	0.415	1.095	1.019	0.457	1.011	0.789	1.023	1.379	0.464	0.471	0.994	0.571	1.381
	0.651	0.465	0.287	0.286	0.722	0.642	0.316	0.761	0.542	0.665	0.693	0.288	0.299	0.635	0.398	0.66	0.695
		0.383															0.708
		0.369															0.751
Mean	0.73225	0.405667	0.32075	0.33475	0.85225	0.87625	0.36625	0.8655	0.60725	0.79625	0.8485	0.33775	0.3555	0.753	0.46325	0.9955	0.718
SEM	0.0666925	0.0299407	0.0242294	0.0279654	0.0842164	0.121187	0.0313884	0.0528985	0.0610497	0.0947746	0.179623	0.0422539	0.0396348	0.0817078	0.0374397	0.14793	0.0169214
log10 transformed values used for multiple pairwise comparisons to WT (unmatched data) with FDR correction
	WT	V112I	L223P	Δ229-235	A240E	R244S	Δ249-252	A250T	A275V	A301S	R310H	V331E	E340K	A341V	T385A	P332Q	N337D
	-0.158015		-0.482804	-0.488117	-0.120331	0.0576661	-0.447332	-0.0824945	-0.246417	-0.0555173	-0.133122	-0.514279	-0.464706	-0.170696	-0.349692	-0.00877392
	-0.185087		-0.551294	-0.504456	-0.0788339	-0.153663	-0.474955	-0.0639892	-0.274905	-0.209715	-0.232102	-0.533132	-0.510042	-0.149967	-0.359519	-0.0172766
	-0.0315171		-0.413413	-0.381952	0.0394141	0.00817418	-0.340084	0.00475116	-0.102923	0.00987563	0.139564	-0.333482	-0.326979	-0.00261362	-0.243364	0.140194
	-0.186419	-0.332547	-0.542118	-0.543634	-0.141463	-0.192465	-0.500313	-0.118615	-0.266001	-0.177178	-0.159267	-0.540608	-0.524329	-0.197226	-0.400117	-0.180456	-0.158015
		-0.416801															-0.149967
		-0.432974															-0.12436

## Sheet: Figure 2C
Figure 2C source data
ATP (proportion of empty vector)
Values plotted on graph and used for multiple pairwise comparisons to WT (unmatched data) with FDR correction
	WT	V112I	L223P	Δ229-235	A240E	R244S	Δ249-252	A250T	A275V	A301S	R310H	V331E	E340K	A341V	T385A	P332Q	N337D
	1.082		0.552	0.552	1.028	1.175	0.632	1.242	1.141	1.386	1.102	0.463	0.554	1.061	0.763	0.97
	1.027		0.334	0.362	0.885	0.927	0.396	0.982	0.854	0.802	0.744	0.285	0.334	0.852	0.547	0.708
	1.152		0.453	0.517	1.156	1.181	0.515	1.17	1.104	1.273	1.246	0.529	0.544	1.192	0.864	1.203
	0.979	0.805	0.316	0.317	0.921	0.922	0.315	1.027	0.928	0.95	0.945	0.379	0.33	1.063	0.638	0.772	0.844
	1.275	1.138	0.943	0.877	1.157	1.056	0.886	1.203	1.246	1.18	1.188	0.876	0.746	0.988	0.923	1.073	0.96
		0.725															1.028
		0.711															1.023
		0.992															1.057
Mean	1.103	0.8742	0.5196	0.525	1.0294	1.0522	0.5488	1.1248	1.0546	1.1182	1.045	0.5064	0.5016	1.0312	0.747	0.9452	0.9824
SEM	0.0517581	0.0828103	0.114161	0.098623	0.0569707	0.0567057	0.0999447	0.050917	0.0716963	0.106718	0.0907469	0.101056	0.078042	0.0555584	0.0695708	0.0921061	0.0380455
