# Supplementary material for: Enrichment of SARM1 alleles encoding variants with constitutively hyperactive NADase in patients with ALS and other motor nerve disorders
Source: eLife journal article supplement (doi:10.7554/elife.70905), 2021-11-19
Supplement: fig2-data1 [file Figure_2_source_data_2.xlsx]

## Sheet: Figure 2 - figure supplement 2B
Figure 2 - figure supplement 2B source data
NAD (proportion of empty vector without NR supplementation)
Values plotted on graph
	no NR					with 2 mM NR supplementation
	set 1	set 2	set 3	Mean	SEM	set 1	set 2	set 3	Mean	SEM
empty vector	1	1	1	1	0	4.002	2.249	2.516	2.92233	0.545308
WT	0.58	0.653	0.759	0.664	0.0519647	2.901	2.152	2.538	2.53033	0.216252
L223P	0.107	0.122	0.14	0.123	0.00953939	0.152	0.229	0.162	0.181	0.024173
Δ229-235	0.116	0.133	0.124	0.124333	0.00491031	0.155	0.193	0.137	0.161667	0.0165059
Δ249-252	0.098	0.174	0.101	0.124333	0.0248484	0.114	0.219	0.111	0.148	0.0355106
V331E	0.147	0.145	0.127	0.139667	0.00635959	0.225	0.27	0.206	0.233667	0.0189766
E340K	0.125	0.166	0.131	0.140667	0.0127845	0.205	0.247	0.159	0.203667	0.0254122
T385A	0.147	0.201	0.193	0.180333	0.0168259	0.238	0.289	0.27	0.265667	0.014881
