# Supplementary material for: Enrichment of SARM1 alleles encoding variants with constitutively hyperactive NADase in patients with ALS and other motor nerve disorders
Source: eLife journal article supplement (doi:10.7554/elife.70905), 2021-11-19
Supplement: fig3-data1 [file Figure_3_source_data_1.xlsx]

## Sheet: Figure 3A
Figure 3A source data
constitutive NADase (25 µM NAD)
Original values plotted on graph			high NADase variants (LHS plot)
	WT	V112I	L223P	Δ229-235	A240E	R244S	Δ249-252	A250T	A275V	A301S	R310H	V331E	E340K	A341V	T385A	P332Q	N337D
prep 1	1.361	1.959	20.088	21.12	1.086	1.249	22.082	0.876	1.813	0.839	0.407	18.104	25.258	0.987	11.111	0.355	0.35
prep 2	0.726	2.269	17.378	13.311	0.625	0.886	14.867	0.574	0.795	0.563	0.57	17.696	16.387	0.977	9.747	0.055	0.482
prep 3	0.668	1.7	17.305	19.558	0.775	0.865	16.129	0.499	1.098	0.727	0.375	16.214	16.095	0.813	9.291	0.38	0.13
prep 4	0.96	2.605	26.858	23.152	0.64	1.113	24.261	0.839	1.014	0.685	0.429	21.176	26.405	0.828	12.621	0.123	0.374
prep 5	0.89	1.778			0.69	0.221		0.254	0.68	0.745	0.524			0.684		0.504	0.358
Mean	0.921	2.0622	20.4073	19.2852	0.7632	0.8668	19.3347	0.6084	1.08	0.7118	0.461	18.2975	21.0362	0.8578	10.6925	0.2834	0.3388
SEM	0.122089	0.167333	2.24563	2.12297	0.0848454	0.176652	2.274	0.114791	0.197888	0.0449293	0.0368687	1.04187	2.77906	0.0565698	0.750135	0.0839694	0.0573746
log10 transformed values used for multiple pairwise comparisons to WT (matched data) with FDR correction
	WT	V112I	L223P	Δ229-235	A240E	R244S	Δ249-252	A250T	A275V	A301S	R310H	V331E	E340K	A341V	T385A	P332Q	N337D
prep 1	0.133858	0.292034	1.30294	1.32469	0.0358298	0.0965624	1.34404	-0.0574959	0.258398	-0.076238	-0.390406	1.25777	1.4024	-0.00568285	1.04575	-0.449772	-0.455932
prep 2	-0.139063	0.355834	1.24	1.12421	-0.20412	-0.0525663	1.17222	-0.241088	-0.0996329	-0.249492	-0.244125	1.24788	1.2145	-0.0101054	0.988871	-1.25964	-0.316953
prep 3	-0.175224	0.230449	1.23817	1.29132	-0.110698	-0.0629839	1.20761	-0.301899	0.0406023	-0.138466	-0.425969	1.20989	1.20669	-0.0899095	0.968062	-0.420216	-0.886057
prep 4	-0.0177288	0.415808	1.42907	1.36459	-0.19382	0.0464952	1.38491	-0.076238	0.00603795	-0.164309	-0.367543	1.32584	1.42169	-0.0819697	1.10109	-0.910095	-0.427128
prep 5	-0.05061	0.249932			-0.161151	-0.655608		-0.595166	-0.167491	-0.127844	-0.280669			-0.164944		-0.297569	-0.446117

## Sheet: Figure 3B
Figure 3B source data
constitutive NADase (25 µM NAD)
Original values plotted on graph
Prep 3 and prep 4 here correspond to prep 2 and prep 3 in Figure 5D with SAM-TIR here, and Δ229-235-Flag + WT-Flag in Figure 5D, being compared to the same WT(-Flag) and Δ229-235(-Flag) assays in parallel.
	WT	Δ229-235	SAM-TIR
prep 1	1.147	19.382	11.97
prep 2	2.019	16.006	21.997
prep 3	1.136	20.947	21.927
prep 4	1.421	18.088	15.946
Mean	1.43075	18.6058	17.96
SEM	0.206866	1.04526	2.44899
log10 transformed values used for one-way ANOVA (matched data) with Tukey's correction
	WT	Δ229-235	SAM-TIR
prep 1	0.0595634	1.2874	1.07809
prep 2	0.305136	1.20428	1.34236
prep 3	0.0553783	1.32112	1.34098
prep 4	0.152594	1.25739	1.20265

## Sheet: Figure 3C
Figure 3C source data
constitutive versus 50 µM NMN-induced NADase (basal as in 3A, matched to 50 µM values)
Original values plotted on graph			high NADase variants (LHS plot)
	25 µM NAD							25 µM NAD + 50 µM NMN
	prep 1	prep 2	prep 3	prep 4	prep 5	Mean	SEM	prep 1	prep 2	prep 3	prep 4	prep 5	Mean	SEM
WT	1.361	0.726	0.668	0.96	0.89	0.921	0.122089	2.764	3.675	2.439	2.58	3.45	2.9816	0.24528
V112I	1.959	2.269	1.7	2.605	1.778	2.0622	0.167333	1.248	2.32	2.07	2.416	1.522	1.9152	0.227858
L223P	20.088	17.378	17.305	26.858		20.4073	2.24563	19.56	14.366	14.542	24.833		18.3253	2.481
Δ229-235	21.12	13.311	19.558	23.152		19.2852	2.12297	18.101	15.331	15.487	31.191		20.0275	3.77501
A240E	1.086	0.625	0.775	0.64	0.69	0.7632	0.0848454	2.458	3.002	2.998	3.948	2.991	3.0794	0.240939
R244S	1.249	0.886	0.865	1.113	0.221	0.8668	0.176652	1.983	1.776	1.962	1.489	1.36	1.714	0.12523
Δ249-252	22.082	14.867	16.129	24.261		19.3347	2.274	21.484	17.158	17.076	24.763		20.1203	1.8587
A250T	0.876	0.574	0.499	0.839	0.254	0.6084	0.114791	2.632	3.142	2.726	2.443	2.005	2.5896	0.18558
A275V	1.813	0.795	1.098	1.014	0.68	1.08	0.197888	2.205	1.949	2.468	3.659	2.798	2.6158	0.296369
A301S	0.839	0.563	0.727	0.685	0.745	0.7118	0.0449293	1.798	1.943	2.247	2.545	1.999	2.1064	0.131431
R310H	0.407	0.57	0.375	0.429	0.524	0.461	0.0368687	0.692	0.745	0.984	0.504	1.501	0.8852	0.17194
V331E	18.104	17.696	16.214	21.176		18.2975	1.04187	20.526	15.435	17.772	22.449		19.0455	1.5393
E340K	25.258	16.387	16.095	26.405		21.0362	2.77906	20.306	19.878	15.452	26.019		20.4138	2.16673
A341V	0.987	0.977	0.813	0.828	0.684	0.8578	0.0565698	1.644	3.514	2.564	2.551	2.16	2.4866	0.306784
T385A	11.111	9.747	9.291	12.621		10.6925	0.750135	12.123	14.262	11.91	16.661		13.739	1.10937
P332Q	0.355	0.055	0.38	0.123	0.504	0.2834	0.0839694	3.019	4.677	3.157	3.218	3.489	3.512	0.301103
N337D	0.35	0.482	0.13	0.374	0.358	0.3388	0.0573746	0.415	1.329	0.909	1.352	1.238	1.0486	0.177128
log10 transformed values used for multiple paired t tests of rates ±NMN for each variant with FDR correction
	25 µM NAD							25 µM NAD + 50 µM NMN
	prep 1	prep 2	prep 3	prep 4	prep 5			prep 1	prep 2	prep 3	prep 4	prep 5
WT	0.133858	-0.139063	-0.175224	-0.0177288	-0.05061			0.441538	0.565257	0.387212	0.41162	0.537819
V112I	0.292034	0.355834	0.230449	0.415808	0.249932			0.0962146	0.365488	0.31597	0.383097	0.182415
L223P	1.30294	1.24	1.23817	1.42907				1.29137	1.15734	1.16262	1.39503
Δ229-235	1.32469	1.12421	1.29132	1.36459				1.2577	1.18557	1.18997	1.49403
A240E	0.0358298	-0.20412	-0.110698	-0.19382	-0.161151			0.390582	0.477411	0.476832	0.596377	0.475816
R244S	0.0965624	-0.0525663	-0.0629839	0.0464952	-0.655608			0.297323	0.249443	0.292699	0.172895	0.133539
Δ249-252	1.34404	1.17222	1.20761	1.38491				1.33212	1.23447	1.23239	1.3938
A250T	-0.0574959	-0.241088	-0.301899	-0.076238	-0.595166			0.420286	0.497206	0.435526	0.387923	0.302114
A275V	0.258398	-0.0996329	0.0406023	0.00603795	-0.167491			0.343409	0.289812	0.392345	0.563362	0.446848
A301S	-0.076238	-0.249492	-0.138466	-0.164309	-0.127844			0.25479	0.288473	0.351603	0.405688	0.300813
R310H	-0.390406	-0.244125	-0.425969	-0.367543	-0.280669			-0.159894	-0.127844	-0.0070049	-0.297569	0.176381
V331E	1.25777	1.24788	1.20989	1.32584				1.3123	1.18851	1.24974	1.3512
E340K	1.4024	1.2145	1.20669	1.42169				1.30762	1.29837	1.18898	1.41529
A341V	-0.00568285	-0.0101054	-0.0899095	-0.0819697	-0.164944			0.215902	0.545802	0.408918	0.40671	0.334454
T385A	1.04575	0.988871	0.968062	1.10109				1.08361	1.15418	1.07591	1.2217
P332Q	-0.449772	-1.25964	-0.420216	-0.910095	-0.297569			0.479863	0.669967	0.499275	0.507586	0.542701
N337D	-0.455932	-0.316953	-0.886057	-0.427128	-0.446117			-0.381952	0.123525	-0.0414361	0.130977	0.0927206

## Sheet: Figure 3D
Figure 3D source data
constitutive versus 10 or 50 µM NMN-induced NADase (matched subset of samples from 3C)
Original values plotted on graph
	25 µM NAD						25 µM NAD + 10 µM NMN						25 µM NAD + 50 µM NMN
	prep 2	prep 3	prep 4	prep 5	Mean	SEM	prep 2	prep 3	prep 4	prep 5	Mean	SEM	prep 2	prep 3	prep 4	prep 5	Mean	SEM
WT	0.726	0.668	0.96	0.89	0.811	0.0683837	1.6	1.406	2.274	1.832	1.778	0.18686	3.675	2.439	2.58	3.45	3.036	0.308769
V112I	2.269	1.7	2.605	1.778	2.088	0.213443	2.127	1.713	3.275	1.824	2.23475	0.357616	2.32	2.07	2.416	1.522	2.082	0.200405
A240E	0.625	0.775	0.64	0.69	0.6825	0.0338194	1.273	0.969	1.975	0.964	1.29525	0.237824	3.002	2.998	3.948	2.991	3.23475	0.237761
R244S	0.886	0.865	1.113	0.221	0.77125	0.191817	0.689	0.343	1.915	0.886	0.95825	0.338085	1.776	1.962	1.489	1.36	1.64675	0.136381
A250T	0.574	0.499	0.839	0.254	0.5415	0.120425	0.741	0.648	1.589	1.311	1.07225	0.226154	3.142	2.726	2.443	2.005	2.579	0.239191
A275V	0.795	1.098	1.014	0.68	0.89675	0.0964291	0.909	1.397	3.294	1.601	1.80025	0.518646	1.949	2.468	3.659	2.798	2.7185	0.358904
A301S	0.563	0.727	0.685	0.745	0.68	0.0409756	1.068	1.457	0.913	1.658	1.274	0.171683	1.943	2.247	2.545	1.999	2.1835	0.137415
R310H	0.57	0.375	0.429	0.524	0.4745	0.0442916	1.307	0.165	0.923	0.52	0.72875	0.247234	0.745	0.984	0.504	1.501	0.9335	0.213035
A341V	0.977	0.813	0.828	0.684	0.8255	0.0599562	1.279	0.868	1.806	1.328	1.32025	0.191973	3.514	2.564	2.551	2.16	2.69725	0.287933
P332Q	0.055	0.38	0.123	0.504	0.2655	0.105912	1.159	1.166	0.195	1.115	0.90875	0.238184	4.677	3.157	3.218	3.489	3.63525	0.354666
N337D	0.482	0.13	0.374	0.358	0.336	0.073982	0.26	0.665	0.085	0.371	0.34525	0.121758	1.329	0.909	1.352	1.238	1.207	0.102337
log10 transformed values used for two-way ANOVA with Šidák's correction
	25 µM NAD						25 µM NAD + 10 µM NMN						25 µM NAD + 50 µM NMN
	prep 2	prep 3	prep 4	prep 5			prep 2	prep 3	prep 4	prep 5			prep 2	prep 3	prep 4	prep 5
WT	-0.139063	-0.175224	-0.0177288	-0.05061			0.20412	0.147985	0.35679	0.262925			0.565257	0.387212	0.41162	0.537819
V112I	0.355834	0.230449	0.415808	0.249932			0.327767	0.233757	0.515211	0.261025			0.365488	0.31597	0.383097	0.182415
A240E	-0.20412	-0.110698	-0.19382	-0.161151			0.104828	-0.0136762	0.295567	-0.015923			0.477411	0.476832	0.596377	0.475816
R244S	-0.0525663	-0.0629839	0.0464952	-0.655608			-0.161781	-0.464706	0.282169	-0.0525663			0.249443	0.292699	0.172895	0.133539
A250T	-0.241088	-0.301899	-0.076238	-0.595166			-0.130182	-0.188425	0.201124	0.117603			0.497206	0.435526	0.387923	0.302114
A275V	-0.0996329	0.0406023	0.00603795	-0.167491			-0.0414361	0.145196	0.517724	0.204391			0.289812	0.392345	0.563362	0.446848
A301S	-0.249492	-0.138466	-0.164309	-0.127844			0.0285713	0.16346	-0.0395292	0.219585			0.288473	0.351603	0.405688	0.300813
R310H	-0.244125	-0.425969	-0.367543	-0.280669			0.116276	-0.782516	-0.0347983	-0.283997			-0.127844	-0.0070049	-0.297569	0.176381
A341V	-0.0101054	-0.0899095	-0.0819697	-0.164944			0.106871	-0.0614803	0.256718	0.123198			0.545802	0.408918	0.40671	0.334454
P332Q	-1.25964	-0.420216	-0.910095	-0.297569			0.0640834	0.0666986	-0.709965	0.0472749			0.669967	0.499275	0.507586	0.542701
N337D	-0.316953	-0.886057	-0.427128	-0.446117			-0.585027	-0.177178	-1.07058	-0.430626			0.123525	-0.0414361	0.130977	0.0927206
