# Supplementary material for: Enrichment of SARM1 alleles encoding variants with constitutively hyperactive NADase in patients with ALS and other motor nerve disorders
Source: eLife journal article supplement (doi:10.7554/elife.70905), 2021-11-19
Supplement: fig3-data1 [file Figure_3_source_data_2.xlsx]

## Sheet: Figure 3 - figure supplement 2A
Figure 3 - figure supplement 2A source data
NADase with 50 µM NMN (25 µM NAD)
Original values plotted on graph			high NADase variants (LHS plot)
	WT	V112I	L223P	Δ229-235	A240E	R244S	Δ249-252	A250T	A275V	A301S	R310H	V331E	E340K	A341V	T385A	P332Q	N337D
prep 1	2.764	1.248	19.56	18.101	2.458	1.983	21.484	2.632	2.205	1.798	0.692	20.526	20.306	1.644	12.123	3.019	0.415
prep 2	3.675	2.32	14.366	15.331	3.002	1.776	17.158	3.142	1.949	1.943	0.745	15.435	19.878	3.514	14.262	4.677	1.329
prep 3	2.439	2.07	14.542	15.487	2.998	1.962	17.076	2.726	2.468	2.247	0.984	17.772	15.452	2.564	11.91	3.157	0.909
prep 4	2.58	2.416	24.833	31.191	3.948	1.489	24.763	2.443	3.659	2.545	0.504	22.449	26.019	2.551	16.661	3.218	1.352
prep 5	3.45	1.522			2.991	1.36		2.005	2.798	1.999	1.501			2.16		3.489	1.238
Mean	2.9816	1.9152	18.3253	20.0275	3.0794	1.714	20.1203	2.5896	2.6158	2.1064	0.8852	19.0455	20.4138	2.4866	13.739	3.512	1.0486
SEM	0.24528	0.227858	2.481	3.77501	0.240939	0.12523	1.8587	0.18558	0.296369	0.131431	0.17194	1.5393	2.16673	0.306784	1.10937	0.301103	0.177128
log10 transformed values used for multiple pairwise comparisons to WT (matched data) with FDR correction
	WT	V112I	L223P	Δ229-235	A240E	R244S	Δ249-252	A250T	A275V	A301S	R310H	V331E	E340K	A341V	T385A	P332Q	N337D
prep 1	0.441538	0.0962146	1.29137	1.2577	0.390582	0.297323	1.33212	0.420286	0.343409	0.25479	-0.159894	1.3123	1.30762	0.215902	1.08361	0.479863	-0.381952
prep 2	0.565257	0.365488	1.15734	1.18557	0.477411	0.249443	1.23447	0.497206	0.289812	0.288473	-0.127844	1.18851	1.29837	0.545802	1.15418	0.669967	0.123525
prep 3	0.387212	0.31597	1.16262	1.18997	0.476832	0.292699	1.23239	0.435526	0.392345	0.351603	-0.0070049	1.24974	1.18898	0.408918	1.07591	0.499275	-0.0414361
prep 4	0.41162	0.383097	1.39503	1.49403	0.596377	0.172895	1.3938	0.387923	0.563362	0.405688	-0.297569	1.3512	1.41529	0.40671	1.2217	0.507586	0.130977
prep 5	0.537819	0.182415			0.475816	0.133539		0.302114	0.446848	0.300813	0.176381			0.334454		0.542701	0.0927206

## Sheet: Figure 3 - figure supplement 2B
Figure 3 - figure supplement 2B source data
NADase with 10 µM NMN (25 µM NAD)
Original values plotted on graph and used for multiple pairwise comparisons to WT (matched data) with FDR correction
	WT	V112I	A240E	R244S	A250T	A275V	A301S	R310H	A341V	P332Q	N337D
prep 2	1.6	2.127	1.273	0.689	0.741	0.909	1.068	1.307	1.279	1.159	0.26
prep 3	1.406	1.713	0.969	0.343	0.648	1.397	1.457	0.165	0.868	1.166	0.665
prep 4	2.274	3.275	1.975	1.915	1.589	3.294	0.913	0.923	1.806	0.195	0.085
prep 5	1.832	1.824	0.964	0.886	1.311	1.601	1.658	0.52	1.328	1.115	0.371
Mean	1.778	2.23475	1.29525	0.95825	1.07225	1.80025	1.274	0.72875	1.32025	0.90875	0.34525
SEM	0.18686	0.357616	0.237824	0.338085	0.226154	0.518646	0.171683	0.247234	0.191973	0.238184	0.121758

## Sheet: Figure 3 - figure supplement 2C
Figure 3 - figure supplement 2C source data
fold induction (+50 µM NMN/basal)
Original values plotted on graph and used for multiple pairwise comparisons to WT (matched data) with FDR correction
	WT	V112I	A240E	R244S	A250T	A275V	A301S	R310H	A341V	P332Q	N337D
prep 1	2.031	0.637	2.263	1.588	3.005	1.216	2.143	1.7	1.666	8.504	1.186
prep 2	5.062	1.022	4.803	2.005	5.474	2.452	3.451	1.307	3.597	85.036	2.757
prep 3	3.651	1.218	3.868	2.268	5.463	2.248	3.091	2.624	3.154	8.308	6.992
prep 4	2.688	0.927	6.169	1.338	2.912	3.608	3.715	1.175	3.081	26.163	3.615
prep 5	3.876	0.856	4.335	6.154	7.894	4.115	2.683	2.865	3.158	6.923	3.458
Mean	3.4616	0.932	4.2876	2.6706	4.9496	2.7278	3.0166	1.9342	2.9312	26.9868	3.6016
SEM	0.520286	0.0955829	0.635713	0.885636	0.925779	0.514339	0.278968	0.344008	0.329207	14.939	0.950371
log10 transformed values used for multiple pairwise comparisons to WT (matched data) with FDR correction
	WT	V112I	A240E	R244S	A250T	A275V	A301S	R310H	A341V	P332Q	N337D
prep 1	0.30771	-0.195861	0.354685	0.20085	0.477844	0.0849336	0.331022	0.230449	0.221675	0.929623	0.0740847
prep 2	0.704322	0.0094509	0.681513	0.302114	0.738305	0.38952	0.537945	0.116276	0.55594	1.9296	0.440437
prep 3	0.562412	0.0856473	0.587486	0.355643	0.737431	0.351796	0.490099	0.418964	0.498862	0.919496	0.844601
prep 4	0.429429	-0.0329203	0.790215	0.126456	0.464191	0.557267	0.569959	0.0700379	0.488692	1.41769	0.558108
prep 5	0.588384	-0.0675262	0.636989	0.789157	0.897297	0.61437	0.428621	0.457125	0.499412	0.840294	0.538825

## Sheet: Figure 3 - figure supplement 2D
Figure 3 - figure supplement 2D source data
fold induction (+10 µM NMN/basal)
Original values plotted on graph and used for multiple pairwise comparisons to WT (matched data) with FDR correction
	WT	V112I	A240E	R244S	A250T	A275V	A301S	R310H	A341V	P332Q	N337D
prep 2	2.204	0.937	2.037	0.778	1.291	1.143	1.897	2.293	1.309	21.073	0.539
prep 3	2.105	1.008	1.25	0.397	1.299	1.272	2.004	0.44	1.068	3.068	5.115
prep 4	2.369	1.257	3.086	1.721	1.894	3.249	1.333	2.152	2.181	1.585	0.227
prep 5	2.058	1.026	1.397	4.009	5.161	2.354	2.226	0.992	1.942	2.212	1.036
Mean	2.184	1.057	1.9425	1.72625	2.41125	2.0045	1.865	1.46925	1.625	6.9845	1.72925
SEM	0.0687641	0.0693794	0.417697	0.810198	0.927395	0.495788	0.190107	0.45017	0.261363	4.70599	1.14081
log10 transformed values used for multiple pairwise comparisons to WT (matched data) with FDR correction
	WT	V112I	A240E	R244S	A250T	A275V	A301S	R310H	A341V	P332Q	N337D
prep 2	0.343212	-0.0282604	0.308991	-0.10902	0.110926	0.0580462	0.278067	0.360404	0.11694	1.32373	-0.268411
prep 3	0.323252	0.00346053	0.09691	-0.401209	0.113609	0.104487	0.301898	-0.356547	0.0285713	0.486855	0.708846
prep 4	0.374565	0.0993353	0.489396	0.235781	0.27738	0.51175	0.12483	0.332842	0.338656	0.200029	-0.643974
prep 5	0.313445	0.0111474	0.145196	0.603036	0.712734	0.371806	0.347525	-0.00348833	0.288249	0.344785	0.0153598
