# Supplementary material for: Enrichment of SARM1 alleles encoding variants with constitutively hyperactive NADase in patients with ALS and other motor nerve disorders
Source: eLife journal article supplement (doi:10.7554/elife.70905), 2021-11-19
Supplement: fig4-data1 [file Figure_4_source_data_1.xlsx]

## Sheet: Figure 4A
Figure 4A source data
NAD (proportion of empty vector)
Original values plotted on graph
	WT	T39M	V88M	G35E	R131G	R267W	A210V
	0.362	0.497	0.341	0.482	0.585	0.158	0.314
	0.573	0.413	0.258	0.403	0.411	0.13	0.205
	0.365	0.439	0.264	0.361	0.351	0.139	0.205
	0.453	0.384	0.274	0.393	0.381	0.115	0.181
	0.56	0.366	0.274	0.476	0.47	0.132	0.239
	0.409	0.374	0.274	0.365	0.36	0.104	0.214
	0.503	0.703	0.435	0.61	0.68	0.186	0.34
Mean	0.460714	0.453714	0.302857	0.441429	0.462571	0.137714	0.242571
SEM	0.033056	0.0449337	0.0243667	0.0335906	0.0474597	0.0103388	0.0229065
log10 transformed values used for multiple pairwise comparisons to WT (matched data) with FDR correction
	WT	T39M	V88M	G35E	R131G	R267W	A210V
	-0.441291	-0.303644	-0.467246	-0.316953	-0.232844	-0.801343	-0.50307
	-0.241845	-0.38405	-0.58838	-0.394695	-0.386158	-0.886057	-0.688246
	-0.437707	-0.357535	-0.578396	-0.442493	-0.454693	-0.856985	-0.688246
	-0.343902	-0.415669	-0.562249	-0.405607	-0.419075	-0.939302	-0.742321
	-0.251812	-0.436519	-0.562249	-0.322393	-0.327902	-0.879426	-0.621602
	-0.388277	-0.427128	-0.562249	-0.437707	-0.443697	-0.982967	-0.669586
	-0.298432	-0.153045	-0.361511	-0.21467	-0.167491	-0.730487	-0.468521

## Sheet: Figure 4C
Figure 4C source data
constitutive NADase (25 µM NAD)
Original values plotted on graph
	WT	R267W	Δ229-235
prep 1	1.067	20.341	21.304
prep 2	0.867	21.795	22.871
prep 3	0.955	14.684	10.413
prep 4	0.506	18.811	15.23
Mean	0.84875	18.9078	17.4545
SEM	0.121358	1.53405	2.86776
log10 transformed values used for one-way ANOVA (matched data) with Tukey's correction
	WT	R267W	Δ229-235
prep 1	0.0281644	1.30837	1.32846
prep 2	-0.0619809	1.33836	1.35929
prep 3	-0.0199966	1.16684	1.01758
prep 4	-0.295849	1.27441	1.1827

## Sheet: Figure 4D
Figure 4D source data
constitutive NADase (25 µM NAD)
Values plotted on graph and used for multiple pairwise comparisons to WT (matched data) with FDR correction
	WT	T39M	V88M	G35E	R131G	A210V
prep 1	0.613	0.356	1.312	0.311	0.68	1.518
prep 2	1.487	1.407	2.047	0.415	0.91	2.028
prep 3	1.077	0.779	1.518	0.539	0.708	1.539
prep 4	0.871	0.538	1.267	0.663	0.546	1.586
prep 5	0.569	0.56	1.835	1.088	0.954	1.843
Mean	0.9234	0.728	1.5958	0.6032	0.7596	1.7028
SEM	0.168216	0.182531	0.150914	0.13482	0.0758404	0.100009

## Sheet: Figure 4E
Figure 4E source data
constitutive versus 50 µM NMN-induced NADase (basal as in 4C, matched to 50 µM values)
Original values plotted on graph
	25 µM NAD						25 µM NAD + 50 µM NMN
	prep 1	prep 2	prep 3	prep 4	Mean	SEM	prep 1	prep 2	prep 3	prep 4	Mean	SEM
WT	1.067	0.867	0.955	0.506	0.84875	0.121358	3.453	3.583	2.064	2.131	2.80775	0.411148
R267W	20.341	21.795	14.684	18.811	18.9078	1.53405	19.19	21.087	11.785	15.119	16.7952	2.08299
Δ229-235	21.304	22.871	10.413	15.23	17.4545	2.86776	24.645	20.341	12.696	14.484	18.0415	2.7405
log10 transformed values used for multiple paired t tests of rates ±NMN for each variant with FDR correction
	25 µM NAD						25 µM NAD + 50 µM NMN
	prep 1	prep 2	prep 3	prep 4			prep 1	prep 2	prep 3	prep 4
WT	0.0281644	-0.0619809	-0.0199966	-0.295849			0.538197	0.554247	0.31471	0.328583
R267W	1.30837	1.33836	1.16684	1.27441			1.28307	1.32401	1.07133	1.17952
Δ229-235	1.32846	1.35929	1.01758	1.1827			1.39173	1.30837	1.10367	1.16089

## Sheet: Figure 4F
Figure 4F source data
constitutive versus 50 µM NMN-induced NADase (basal as in 4D, matched to 50 µM values)
Values plotted on graph and used for multiple paired t tests of rates ±NMN for each variant with FDR correction
	25 µM NAD							25 µM NAD + 50 µM NMN
	prep 1	prep 2	prep 3	prep 4	prep 5	Mean	SEM	prep 1	prep 2	prep 3	prep 4	prep 5	Mean	SEM
WT	0.613	1.487	1.077	0.871	0.569	0.9234	0.168216	2.189	3.047	2.591	1.936	2.492	2.451	0.188463
T39M	0.356	1.407	0.779	0.538	0.56	0.728	0.182531	3.021	2.02	1.896	1.546	1.998	2.0962	0.246323
V88M	1.312	2.047	1.518	1.267	1.835	1.5958	0.150914	3.577	3.412	3.166	2.249	3.409	3.1626	0.237625
G35E	0.311	0.415	0.539	0.663	1.088	0.6032	0.13482	1.857	2.563	2.101	2.272	2.362	2.231	0.11955
R131G	0.68	0.91	0.708	0.546	0.954	0.7596	0.0758404	2.292	2.672	1.897	2.013	1.892	2.1532	0.14865
A210V	1.518	2.028	1.539	1.586	1.843	1.7028	0.100009	3.228	3.16	3.554	2.358	3.471	3.1542	0.212087
