# Supplementary material for: Enrichment of SARM1 alleles encoding variants with constitutively hyperactive NADase in patients with ALS and other motor nerve disorders
Source: eLife journal article supplement (doi:10.7554/elife.70905), 2021-11-19
Supplement: fig5-data1 [file Figure_5_source_data_1.xlsx]

## Sheet: Figure 5A
Figure 5A source data
NAD (proportion of empty vector)
Original values plotted on graph
	Δ229-235-Flag	Δ229-235-Flag + WT-HA	WT-HA	WT-Flag + WT-HA	WT-Flag
	0.166	0.237	0.594	0.604	0.682
	0.271	0.261	0.705	0.732	0.775
	0.189	0.225	0.465	0.618	0.434
	0.259	0.3	0.624	0.757	0.679
	0.27	0.311	0.63	0.761	0.684
Mean	0.231	0.2668	0.6036	0.6944	0.6508
SEM	0.0222419	0.0169186	0.0391773	0.0344798	0.0571397
log10 transformed values used for one-way ANOVA (matched data) with Tukey's correction
	Δ229-235-Flag	Δ229-235-Flag + WT-HA	WT-HA	WT-Flag + WT-HA	WT-Flag
	-0.779892	-0.625252	-0.226214	-0.218963	-0.166216
	-0.567031	-0.583359	-0.151811	-0.135489	-0.110698
	-0.723538	-0.647817	-0.332547	-0.209012	-0.36251
	-0.5867	-0.522879	-0.204815	-0.120904	-0.16813
	-0.568636	-0.50724	-0.200659	-0.118615	-0.164944

## Sheet: Figure 5D
Figure 5D source data
constitutive NADase (25 µM NAD)
Original values plotted on graph
Prep 2 and prep 3 here correspond to prep 3 and prep 4 in Figure 3B with Δ229-235-Flag + WT-Flag here, and SAM-TIR in Figure 3B, being compared to the same WT(-Flag) and Δ229-235(-Flag) assays in parallel.
	WT-Flag	Δ229-235-Flag + WT-Flag	Δ229-235-Flag
prep 1	0.606	10.095	21.601
prep 2	1.136	11.873	20.947
prep 3	1.421	9.413	18.088
prep 4	0.858	10.765	14.676
Mean	1.00525	10.5365	18.828
SEM	0.175838	0.524056	1.58025
log10 transformed values used for one-way ANOVA (matched data) with Tukey's correction
	WT-Flag	Δ229-235-Flag + WT-Flag	Δ229-235-Flag
prep 1	-0.217527	1.00411	1.33447
prep 2	0.0553783	1.07456	1.32112
prep 3	0.152594	0.973728	1.25739
prep 4	-0.0665127	1.03201	1.16661

## Sheet: Figure 5E
Figure 5E source data
constitutive versus 50 µM NMN-induced NADase (basal as in 5D, matched to 50 µM values)
Original values plotted on graph
	25 µM NAD						25 µM NAD + 50 µM NMN
	prep 1	prep 2	prep 3	prep 4	Mean	SEM	prep 1	prep 2	prep 3	prep 4	Mean	SEM
WT-Flag	0.606	1.136	1.421	0.858	1.00525	0.175838	1.669	3.41	5.45	4.14	3.66725	0.788504
Δ229-235-Flag + WT-Flag	10.095	11.873	9.413	10.765	10.5365	0.524056	6.905	15.864	9.363	8.614	10.1865	1.96115
Δ229-235-Flag	21.601	20.947	18.088	14.676	18.828	1.58025	17.019	20.008	12.507	11.909	15.3607	1.92365
log10 transformed values used for multiple paired t tests of rates ±NMN for each variant with FDR correction
	25 µM NAD						25 µM NAD + 50 µM NMN
	prep 1	prep 2	prep 3	prep 4			prep 1	prep 2	prep 3	prep 4
WT-Flag	-0.217527	0.0553783	0.152594	-0.0665127			0.222456	0.532754	0.736397	0.617
Δ229-235-Flag + WT-Flag	1.00411	1.07456	0.973728	1.03201			0.839164	1.20041	0.971415	0.935205
Δ229-235-Flag	1.33447	1.32112	1.25739	1.16661			1.23093	1.3012	1.09715	1.07588
