# Supplementary material for: Enrichment of SARM1 alleles encoding variants with constitutively hyperactive NADase in patients with ALS and other motor nerve disorders
Source: eLife journal article supplement (doi:10.7554/elife.70905), 2021-11-19
Supplement: fig6-data1 [file Figure_6_source_data_1.xlsx]

## Sheet: Figure 6B
Figure 6B source data
DsRed-positive neuron numbers
Values plotted on graph and used for one-way ANOVA with Tukey's correction
	WT	Δ229-235	WT +NR	Δ229-235 +NR
	25	3	18	31
	24	3	19	27
			17	36
	22	1	13	30
			16	22
			18	20
	21	5	20	15
			22	21
			17	13
	20	4	21	28
			21	30
			23	29
			16	32
			24	24
			18	20
			19	15
			19	11
Mean	22.4	3.2	18.8824	23.7647
SEM	0.927362	0.663325	0.67455	1.79364

## Sheet: Figure 6C
Figure 6C source data
% remaining injected (DsRed-positive) cells after treatments
Values plotted on graph and used for paired t test (+NR, no media change) or two-way ANOVA with Šidák's correction (separate tests for each of the other conditions)
	+NR (no media change)					+NR with media change					NR removed					NR removed + 100 nM FK866
	WT		Δ229-235			WT		Δ229-235			WT		Δ229-235			WT		Δ229-235
	8h	24h	8h	24h		8h	24h	8h	24h		8h	24h	8h	24h		8h	24h	8h	24h
	-	72.2	-	96.8		84.6	84.6	46.7	33.3		75	75	36.4	18.2		94.4	83.3	5	0
	-	57.9	-	100		60	60	33.3	26.7		54.5	45.5	19	9.5		94.1	82.4	15.4	0
	-	70.6	-	97.2		85.7	85.7	17.9	10.7		90.5	81	6.7	6.7		60.9	52.2	3.4	0
	-	93.8	-	84.4		100	88.9	30	25		94.7	94.7	13.3	13.3		100	89.5	0	0
	-	95.8	-	70.8
Mean		78.06		89.84		82.575	79.8	31.975	23.925		78.675	74.05	18.85	11.925		87.35	76.85	5.95	0
SEM		7.27624		5.46787		8.30225	6.66271	5.92022	4.75787		9.10388	10.3712	6.36691	2.49077		8.92044	8.36685	3.31801	0
