# Supplementary material for: Enrichment of SARM1 alleles encoding variants with constitutively hyperactive NADase in patients with ALS and other motor nerve disorders
Source: eLife journal article supplement (doi:10.7554/elife.70905), 2021-11-19
Supplement: fig6-data1 [file Figure_6_source_data_2.xlsx]

## Sheet: Figure 6 - figure supplement 1B
Figure 6 - figure supplement 1B source data
% remaining intact DsRed-positive neurites 24h after cut
Original values plotted on graph and for paired two-tailed t-test
	WT	E642A
	16	100
	0	97.67
	25.64	98.7
Mean	13.88	98.79
SEM	5.79177	0.522169

## Sheet: Figure 6 - figure supplement 2A
Figure 6 - figure supplement 2A source data
DsRed-positive neuron numbers
	empty vector	empty vector +NR
	30	29
	30	27
	29	27
Mean	29.6667	27.6667
SEM	0.333333	0.666667

## Sheet: Figure 6 - figure supplement 2B
Figure 6 - figure supplement 2B source data
% remaining injected (DsRed-positive) cells after treatments
	NR removed + 100 nM FK866
	empty vector
	8h	24h
	75.9	72.4
	96.3	92.6
	92.6	92.6
Mean	88.2667	85.8667
SEM	6.27491	6.73333
