# Supplementary material for: Enrichment of SARM1 alleles encoding variants with constitutively hyperactive NADase in patients with ALS and other motor nerve disorders
Source: eLife journal article supplement (doi:10.7554/elife.70905), 2021-11-19
Supplement: fig7-data1 [file Figure_7_source_data_1.xlsx]

## Sheet: Figure 7A
Figure 7A source data
NAD (proportion of empty vector)
Original values plotted on graph
	WT	E642A	Δ229-235	Δ229-235/E642A
	0.549	0.848	0.157	0.861
	0.546	0.854	0.104	0.879
	0.573	0.878	0.119	0.895
	0.588	1.149	0.112	0.878
Mean	0.564	0.93225	0.123	0.87825
SEM	0.010025	0.0725401	0.0117402	0.00694472
log10 transformed values used for one-way ANOVA (matched data) with Tukey's correction
	WT	E642A	Δ229-235	Δ229-235/E642A
	-0.260428	-0.0716041	-0.8041	-0.0649968
	-0.262807	-0.0685421	-0.982967	-0.0560111
	-0.241845	-0.0565055	-0.924453	-0.048177
	-0.230623	0.06032	-0.950782	-0.0565055

## Sheet: Figure 7C
Figure 7C source data
DsRed-positive neuron numbers
Values plotted on graph and used for one-way ANOVA (matched data) with Tukey's correction
	Δ229-235	Δ229-235/E642A	Δ229-235 +NR	Δ229-235/E642A +NR
	3	25	19	26
	1	22	23	21
	6	31	33	33
	3	29	28	28
Mean	3.25	26.75	25.75	27
SEM	1.03078	2.01556	3.03795	2.48328

## Sheet: Figure 7D
Figure 7D source data
% remaining injected (DsRed-positive) cells after treatments
Values plotted on graph and used for two-way ANOVA with Šidák's correction
	NR removed + 100 nM FK866
	Δ229-235		Δ229-235/E642A
	8h	24h	8h	24h
	5.3	5.3	83	81
	6.3	1.9	85.7	74.3
	18.2	0	87.9	69.7
	21.4	3.6	92.9	78.6
Mean	12.8	2.7	87.375	75.9
SEM	4.09898	1.13652	2.09657	2.48831
